# Supplementary material for: Baseline PSMA PET/CT parameters predict overall survival and treatment response in metastatic castration-resistant prostate cancer patients
Source: Springer Nature journal article supplement (doi:10.1007/s00330-025-11360-3), 2025-01-22
Supplement: MOESM1 [file 330_2025_11360_MOESM1_ESM.pdf]

**Baseline PSMA PET/CT parameters predict overall survival and treatment response in metastatic castration-resistant prostate cancer patients**

**ELECTRONIC SUPPLEMENTARY MATERIAL**

*Table S1*

| <i>For patient-level analysis</i> |                                                                                                                                                                                                                                                                  |
|-----------------------------------|------------------------------------------------------------------------------------------------------------------------------------------------------------------------------------------------------------------------------------------------------------------|
| <b>Parameter</b>                  | <b>Explanation (IBSI code [20])</b>                                                                                                                                                                                                                              |
| <b>Morphological</b>              |                                                                                                                                                                                                                                                                  |
| PSMA-TV                           | Total tumour volume in mL (RNU0)                                                                                                                                                                                                                                 |
| DmaxVox                           | The distance in cm between the two lesions that are the furthest apart, using the outermost voxels (no IBSI code)                                                                                                                                                |
| <b>Intensity-based*</b>           |                                                                                                                                                                                                                                                                  |
| SUV <sub>mean</sub>               | The mean grey level intensity within the total tumour volume (Q4LE)                                                                                                                                                                                              |
| SUV <sub>max</sub>                | The maximum grey level intensity within the total tumour volume (84IY)                                                                                                                                                                                           |
| TL-PSMA                           | The product of SUV <sub>mean</sub> and total tumour volume in mL (no IBSI code)                                                                                                                                                                                  |
| <i>For lesion-level analysis</i>  |                                                                                                                                                                                                                                                                  |
| <b>Parameter</b>                  | <b>Explanation (IBSI code [20])</b>                                                                                                                                                                                                                              |
| <b>Morphological</b>              |                                                                                                                                                                                                                                                                  |
| PSMA-TV                           | Lesion volume in mL (RNU0)                                                                                                                                                                                                                                       |
| Sphericity                        | A measure of the roundness of the shape of the tumour region relative to a sphere; higher values correspond to higher roundness (QCFX)                                                                                                                           |
| <b>Intensity-based*</b>           |                                                                                                                                                                                                                                                                  |
| SUV <sub>mean</sub>               | The mean grey level intensity within the VOI (Q4LE)                                                                                                                                                                                                              |
| SUV <sub>max</sub>                | The maximum grey level intensity within the VOI (84IY)                                                                                                                                                                                                           |
| Kurtosis                          | A measure of peakedness of the grey level distribution; higher values mean that the mass of the distribution is concentrated towards the tail(s), lower values mean that the mass of the distribution is concentrated towards a spike near the mean value (IPH6) |
| Interquartile range               | The difference between the 25 <sup>th</sup> and 75 <sup>th</sup> percentiles of the grey level distribution (SALO)                                                                                                                                               |
| TL-PSMA                           | The product of SUV <sub>mean</sub> and volume in mL (no IBSI code)                                                                                                                                                                                               |

| <b>GLCM**</b> |                                                                                                                                                                                |
|---------------|--------------------------------------------------------------------------------------------------------------------------------------------------------------------------------|
| Energy        | Or Angular Second Moment; a measure of homogeneous patterns in the VOI, a greater energy implies that there is a higher frequency of neighbouring intensity value pairs (8ZQL) |
| Contrast      | A measure of the local intensity variation; larger values correlate with a higher differences in grey level intensity values among neighbouring voxels (ACUI)                  |
| Correlation   | The linear dependency of grey level values to their respective voxels in the GLCM; higher values mean higher correlation (NI2N)                                                |
| Entropy       | A measure of randomness in neighbourhood grey level intensity values (TU9B)                                                                                                    |
| Homogeneity   | Or Inverse Difference; a measure of homogeneity of grey level intensity values, higher values mean more uniform grey levels (IB1Z)                                             |

\*The intensity of a pixel or voxel is also called a grey level.

\*\* The GLCM is calculated from 13 different directions in 3D and the GLCM features are average values over these 13 directions.

PSMA-TV: PSMA-based tumour volume, SUV: standardised uptake value, VOI: volume of interest, TL-PSMA: PSMA-based total lesion uptake. GLCM: grey level co-occurrence matrix.

**Table S2**

Multivariate Cox regression analyses for overall survival with PSMA PET/CT and clinical parameters.

\* HR: hazard ratio, displayed per unit increase or, in case of log<sub>2</sub> transformation, per doubling. \*\* p-values are displayed when < 0.05.

| Variable name (unit)                                 | OS    |             |           |
|------------------------------------------------------|-------|-------------|-----------|
|                                                      | HR*   | 95% C.I.    | p-value** |
| Log <sub>2</sub> (TL-PSMA (SUV×mL))                  | 1.402 | 1.161-1.693 | < 0.001   |
| Log <sub>2</sub> (baseline PSA (ng/mL))              | 0.826 | 0.693-0.985 | 0.034     |
| Baseline Hb (mmol/L)                                 | 0.647 | 0.464-0.903 | 0.010     |
| Line of treatment (second- versus first-line)        | 3.406 | 1.679-6.909 | < 0.001   |
| DmaxVox (per 10 cm)                                  | 1.314 | 1.065-1.619 | 0.011     |
| Log <sub>2</sub> (baseline PSA (ng/mL))              | 0.864 | 0.724-1.030 |           |
| Baseline Hb (mmol/L)                                 | 0.695 | 0.496-0.975 | 0.035     |
| Line of treatment (second- versus first-line)        | 3.180 | 1.521-6.645 | 0.002     |
| Log <sub>2</sub> (PSA density (ng/mL <sup>2</sup> )) | 0.760 | 0.652-0.885 | <0.001    |
| Baseline Hb (mmol/L)                                 | 0.640 | 0.465-0.883 | 0.006     |
| Line of treatment (second- versus first-line)        | 3.941 | 1.984-7.828 | < 0.001   |

**Table S3**

Lesion characteristics (n = 241). Categorical data are presented as number (percentage), continuous data as median (interquartile range).

| Characteristic                 | Value |                |
|--------------------------------|-------|----------------|
| Received treatment             |       |                |
| ARTA                           | 113   | (47%)          |
| Chemotherapy                   | 128   | (53%)          |
| Line of treatment              |       |                |
| 1 <sup>st</sup>                | 122   | (51%)          |
| 2 <sup>nd</sup>                | 119   | (49%)          |
| Lesion location                |       |                |
| Prostate                       | 32    | (13%)          |
| Lymph node                     | 64    | (27%)          |
| <i>N1</i>                      | 21    |                |
| <i>M1a</i>                     | 43    |                |
| Bone                           | 139   | (58%)          |
| <i>Locoregional</i>            | 55    |                |
| <i>Axial, non-locoregional</i> | 59    |                |
| <i>Appendicular</i>            | 25    |                |
| Visceral                       | 6     | (3%)           |
| SUV <sub>mean</sub>            | 9.4   | (7.3 – 13.6)   |
| SUV <sub>max</sub>             | 30.0  | (16.3 – 47.5)  |
| PSMA-TV (mL)                   | 7.7   | (3.4 – 21.9)   |
| TL-PSMA (SUVxmL)               | 76.4  | (30.4 – 239.4) |

**Table S4**

Univariate logistic regression analyses for imaging-based lesion progression after 3-4 months of treatment, all corrected for line of treatment. \* OR: odds ratio, displayed per unit increase or, in case of  $\log_2$  transformation, per doubling. \*\* p-values are displayed when < 0.05. Ref = reference group.

| Variable name (unit)                    | Lesion progression (n = 241 lesions) |              |           |
|-----------------------------------------|--------------------------------------|--------------|-----------|
|                                         | OR*                                  | 95% CI       | p-value** |
| <b>Location</b>                         |                                      |              | 0.013     |
| Prostate                                | 0.169                                | 0.049-0.589  | 0.005     |
| Lymph node                              | 0.553                                | 0.282-1.086  |           |
| Bone                                    | ref                                  | ref          |           |
| Visceral                                | 0.232                                | 0.026-2.076  |           |
| <b>Morphological</b>                    |                                      |              |           |
| Log <sub>2</sub> (PSMA-TV (mL))         | 0.977                                | 0.835-1.142  |           |
| Log <sub>2</sub> (Sphericity)           | 1.162                                | 0.472-2.859  |           |
| <b>Intensity-based</b>                  |                                      |              |           |
| Log <sub>2</sub> (SUV <sub>mean</sub> ) | 1.973                                | 1.265 -3.079 | 0.003     |
| Log <sub>2</sub> (SUV <sub>max</sub> )  | 1.400                                | 1.049-1.868  | 0.022     |
| Log <sub>2</sub> (SUV-kurtosis)         | 0.808                                | 0.614-1.064  |           |
| Log <sub>2</sub> (SUV-IQR)              | 1.352                                | 1.071 -1.707 | 0.011     |
| Log <sub>2</sub> (TL-PSMA (SUV×mL))     | 1.056                                | 0.915-1.219  |           |
| <b>GLCM</b>                             |                                      |              |           |
| Log <sub>2</sub> (Energy)               | 0.837                                | 0.713-0.982  | 0.029     |
| Log <sub>2</sub> (Contrast)             | 1.168                                | 1.035-1.318  | 0.012     |
| Correlation                             | 0.812                                | 0.150-4.403  |           |
| Entropy                                 | 1.181                                | 1.004 -1.388 | 0.044     |
| Homogeneity                             | 0.065                                | 0.005-0.802  | 0.033     |
